# Supplementary material for: Optional part-time and longer GP training modules in GP practices associated with more trainees becoming GPs – a cohort study in Switzerland
Source: Springer Nature journal article supplement (doi:10.1186/s12875-017-0706-1), 2018-01-05
Supplement: MOESM2 [file 15347074]

## From training to profession - becoming a General Practitioner

Dear colleagues,

Primary Medicine is the base of our health system. Since 1998, the Stiftung zur Förderung der Weiterbildung in Hausarztmedizin, WHM (Foundation for the Promotion of Family Medicine) offers opportunities to participate in General Practitioner (GP) trainings to strengthen this base.

The Bernese Institute for Family Medicine, supplied by the WHM, surveys those who took advantage of this program, in part to determine which aspects of the training are associated with the decision to become a General Practitioner or join a GP in practice.

We appreciate your participation in this survey. Your data will remain anonymous. You will need 10-15 minutes to fill out the survey.

If you are personally interested in the results, please write your e-mail address at the end of the survey and we will keep you informed.

Kind regards,

Dr. med. Sven Streit  
Studienleiter  
Wissenschaftlicher Mitarbeiter  
Berner Institut für Hausarztmedizin BIHAM  
[sven.streit@biham.unibe.ch](mailto:sven.streit@biham.unibe.ch)

### Personal data

We need your personal data so we can link your survey answers to the evaluation form you filled out after your GP training (database WHM).

First name: \_\_\_\_\_

Last name: \_\_\_\_\_

E-mail address: \_\_\_\_\_

### Survey

1. Are you currently working in a GP office as a GP?

yes -> Please continue with question #2.

no -> Please continue with question #5.

2. Please tell us about your work:

Date you started working in a GP office: \_\_\_\_\_

Postal Code of your GP office: \_\_\_\_\_

What percentage to do you work (e.g., 50%): \_\_\_\_\_

3. Did your GP training play an important role in your decision to become a GP?

very unimportant

unimportant

neutral

important

very important

4. List the three most important reasons you became a GP.

1.

\_\_\_\_\_

2.

\_\_\_\_\_

3.

\_\_\_\_\_

Please continue with question #10.

5. Which of the following statements best fits your current professional path?

- I will definitely work as a GP, and have made my plans to work in a GP office.
- I am still on the Family Medicine track, but I don't yet have a fixed plan for starting working in a GP office
- I am not sure if Family Medicine is right for me, and I cannot not make a decision yet.
- I decided against Family Medicine.
- Another option (please describe): I \_\_\_\_\_

6. Please tell us about your plans to work in a GP office:

Expected start date: \_\_\_\_\_  
Where do you plan to open your office? (postal code): \_\_\_\_\_  
What percentage to do you plan work (e.g. 50%): \_\_\_\_\_

7. Which career track did you decide to follow?

\_\_\_\_\_

8. Which of the following statements is true for you?

- I might switch to Family Medicine
- I don't think I will switch to Family Medicine
- Other comments:

\_\_\_\_\_

9. List the three most important reasons you decided against becoming a GP.

1. \_\_\_\_\_
2. \_\_\_\_\_
3. \_\_\_\_\_

10. Do you have any other comment?

\_\_\_\_\_

11. Please enter your e-mail address again, if want you to receive the results of the study.

\_\_\_\_\_

**Thank you very much for your participation!**

Please return this survey to:

Post: Berner Institut für Hausarztmedizin, BIHAM zHd. Sven Streit, Gesellschaftsstrasse 49, 3012 Bern

Fax: 031 632 89 90
